# Supplementary material for: Region-specific inhibition of 14-3-3 proteins induces psychomotor behaviors in mice
Source: PubMed Central journal article supplement (PMC6386769; doi:10.1038/s41537-018-0069-1), 2019-01-14
Supplement: 41537_2018_69_MOESM1_ESM.pdf [file 41537_2018_69_MOESM1_ESM.pdf]

**Supplementary Table 1.** List of antibodies used in western blotting

|                      | Antibody    | Vendor                   | Catalog # | Lot #     | Host              | Dilution |
|----------------------|-------------|--------------------------|-----------|-----------|-------------------|----------|
| Primary antibodies   | anti-GAPDH  | Life technologies        | AM4300    | 00583807  | mouse monoclonal  | 1:10,000 |
|                      | anti-GFP    | Santa Cruz Biotechnology | sc-8334   | K1215     | rabbit polyclonal | 1:1000   |
|                      | anti-NR1    | Millipore                | 05-432    | 2726812   | mouse monoclonal  | 1:1000   |
|                      | anti-NR2A   | Millipore                | 07-632    | 1972322   | Rabbit polyclonal | 1:1000   |
|                      | anti-PSD95  | Abcam                    | ab2723    | 6G61C9    | mouse monoclonal  | 1:1000   |
| Secondary antibodies | anti-Mouse  | LI-COR                   | 926-32210 | C70301-02 | Goat              | 1:10,000 |
|                      | anti-Rabbit | LI-COR                   | 926-32211 | C41217-04 | Goat              | 1:10,000 |

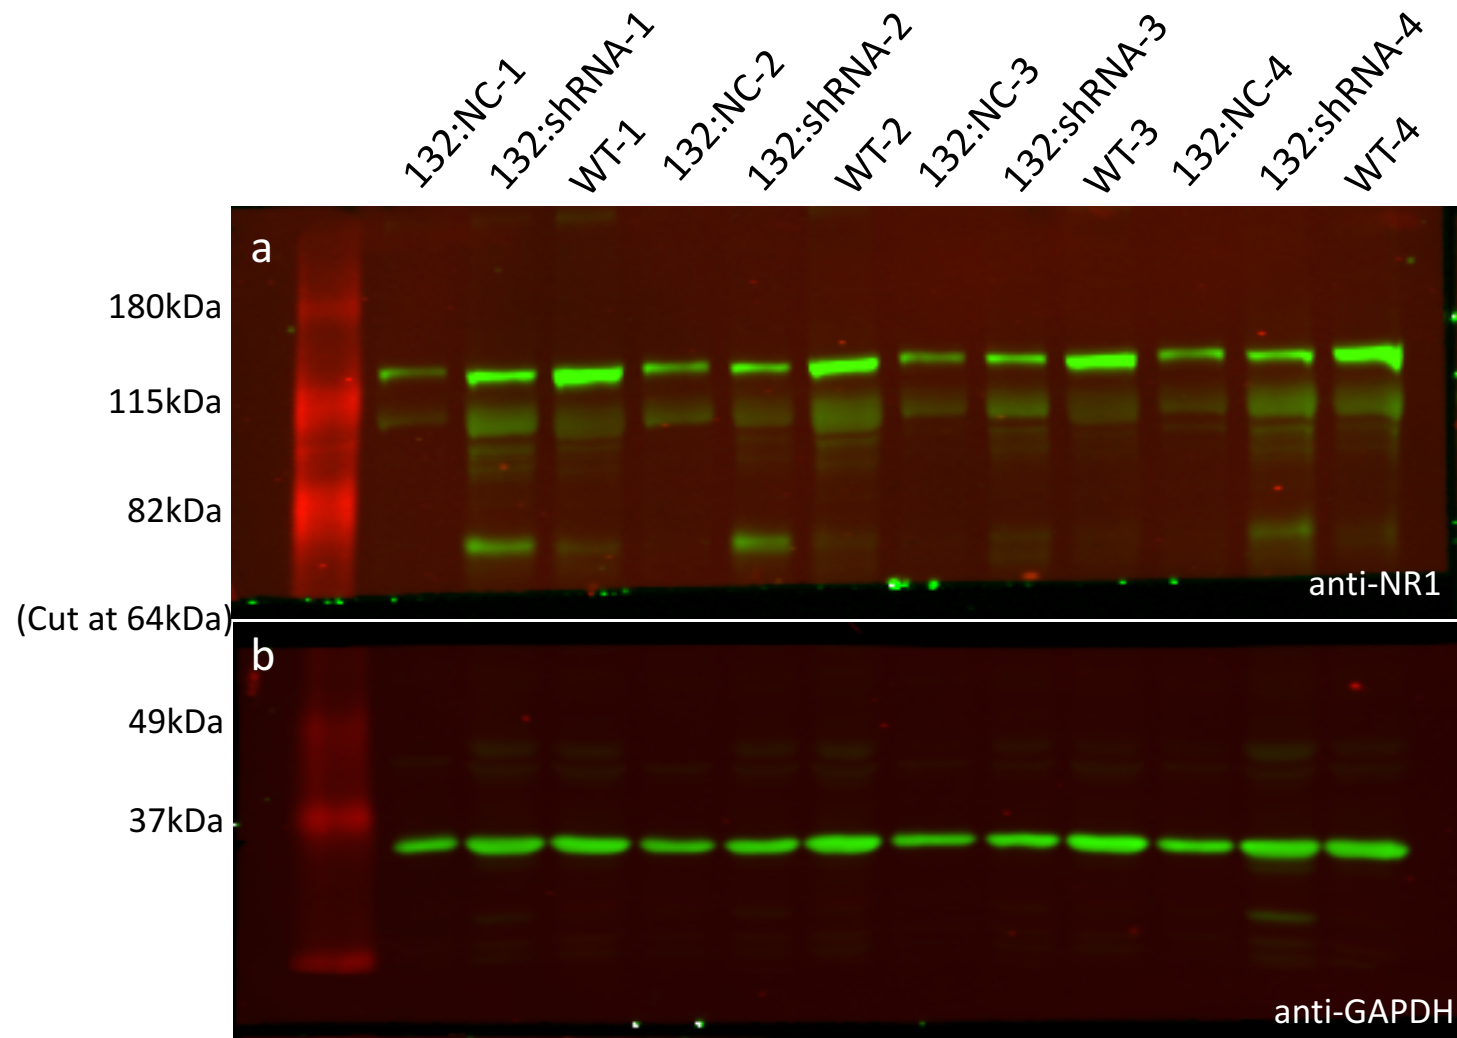

**Supplementary Figure 1.** Un-cropped blot #1 for Fig.3A. This membrane was cut at 64kDa after transfer. Then the top half was blotted with anti-NR1(a), bottom half was blotted with anti-GAPDH(b). (132 refer to 14-3-3 functional knock-out mice.)

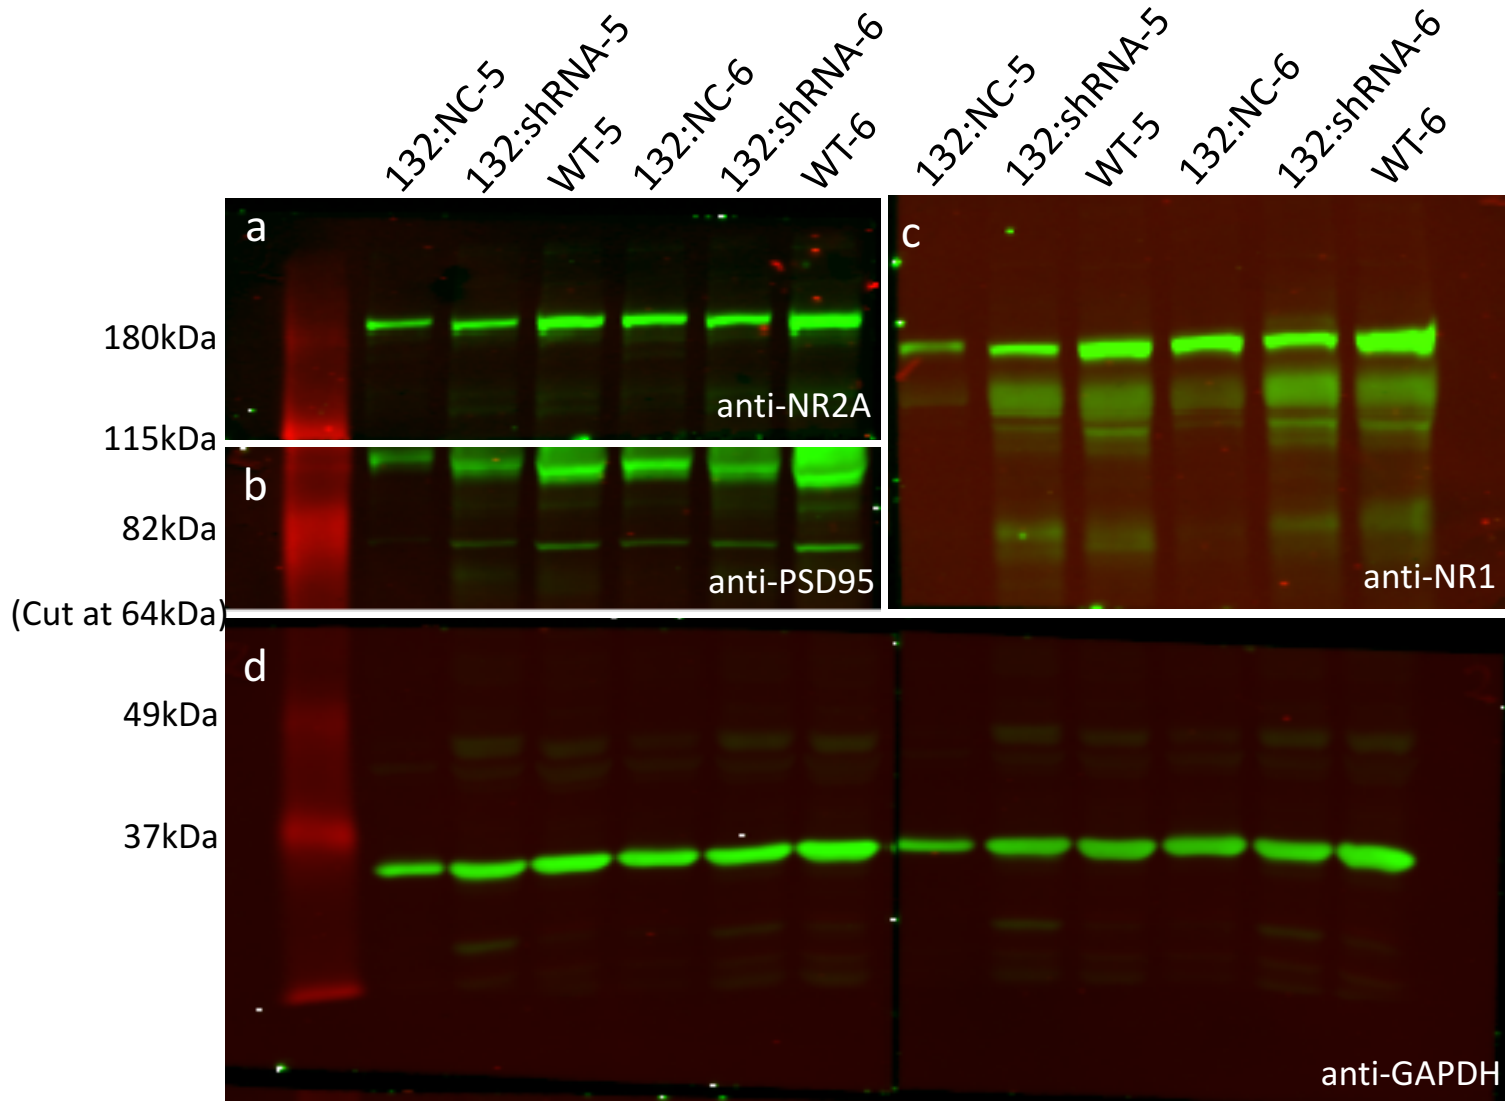

**Supplementary Figure 2.** Un-cropped blot #2 for Fig.3A. After transfer, this membrane was first cut in the middle, left half was then cut at 115kDa and 64kDa, right half was cut at 64kDa. Membranes were blotted with anti-NR2A(a), anti-PSD95(b), anti-NR1(c), and anti-GAPDH(d).

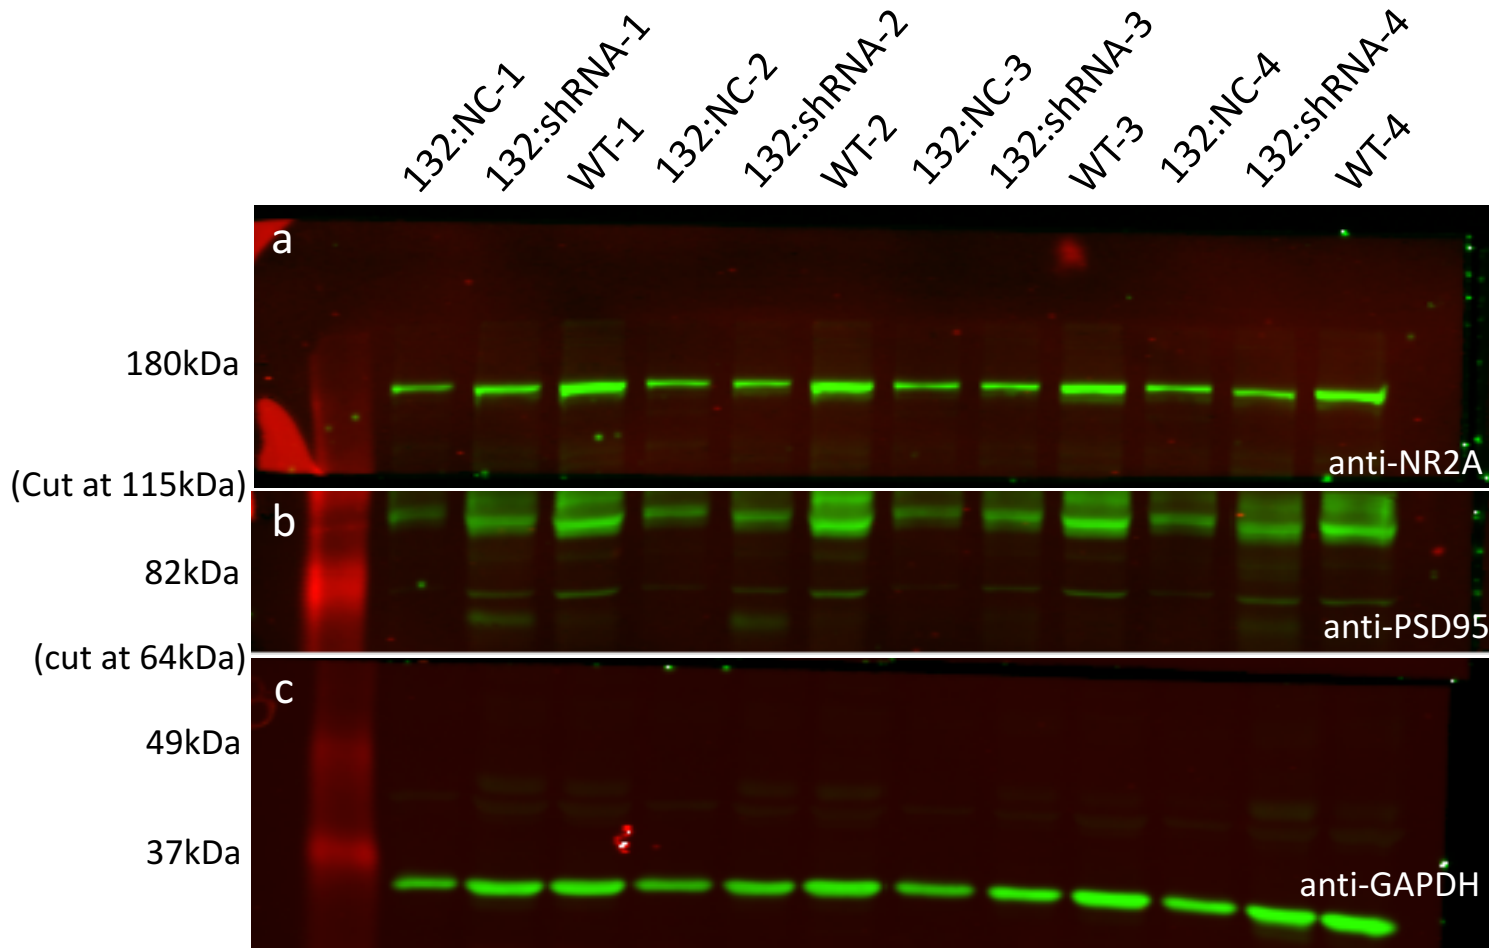

**Supplementary Figure 3.** Un-cropped blot #3 for Fig.3A. After transfer, this membrane was cut at 115kDa and 64kDa. Membranes were blotted with anti-NR2A(a), anti-PSD95(b), and anti-GAPDH(c).

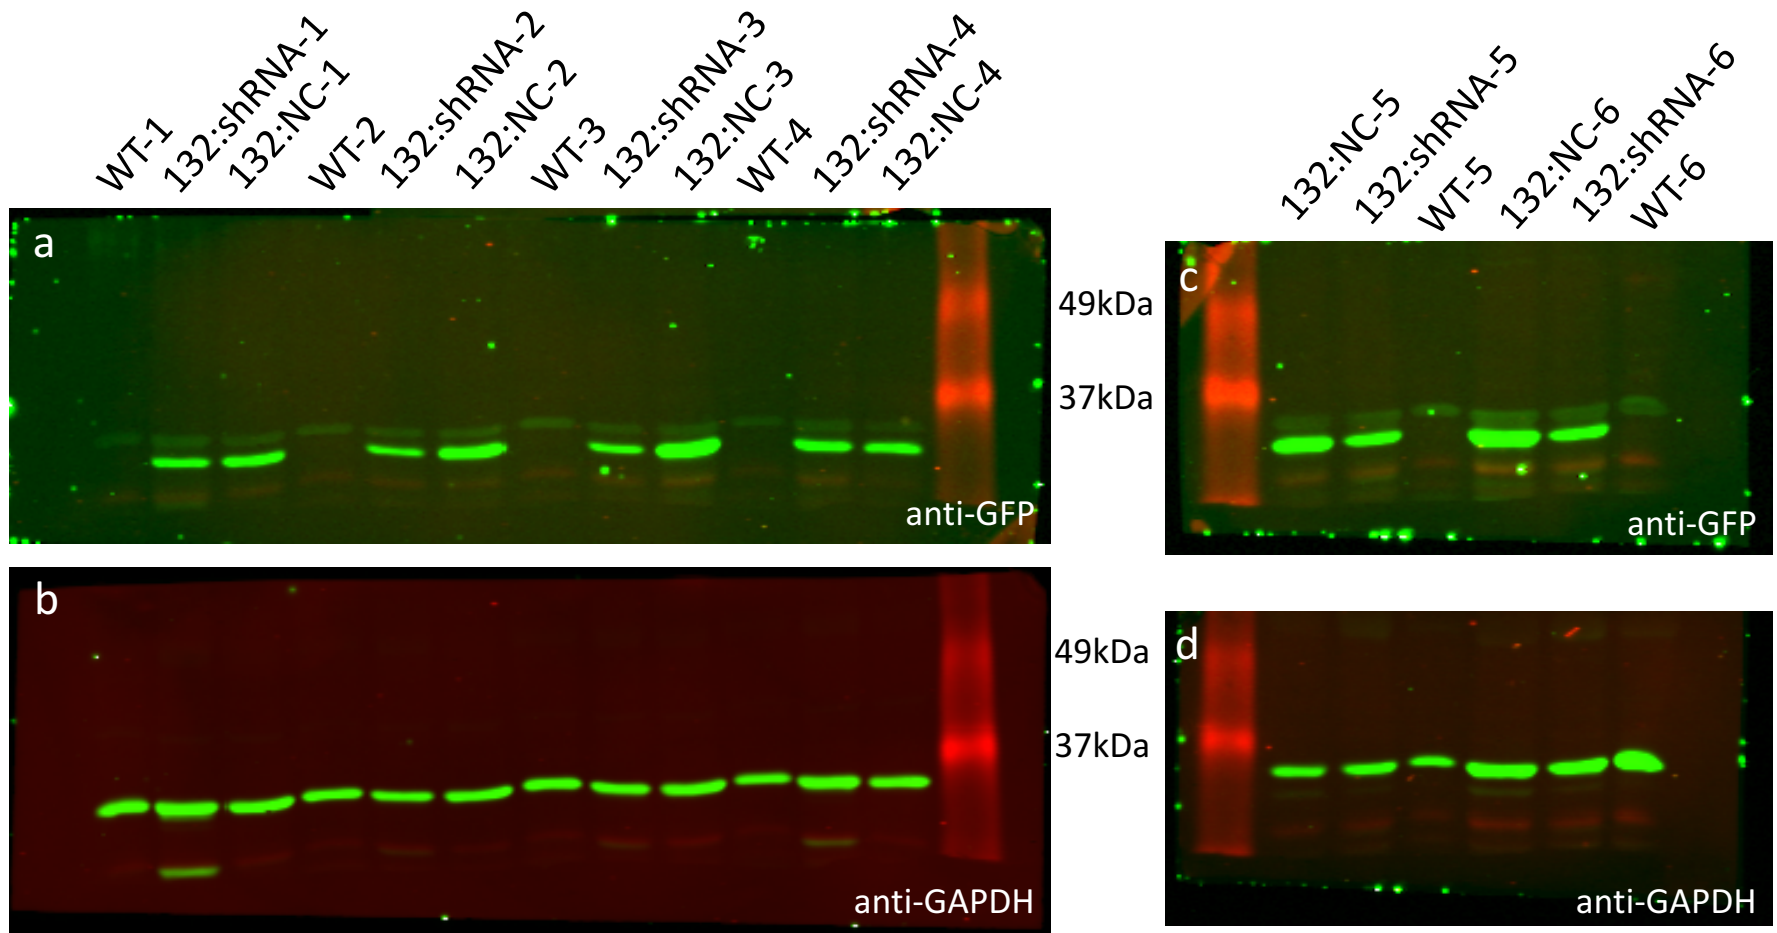

**Supplementary Figure 4.** Un-cropped blot #1 and #2 for Fig.3C. This membrane was cut in the at 64kDa after transfer. Membranes were first blotted with anti-GAPDH(b, d). After scanning, the membranes were stripped and re-blotted with anti-GFP(a, c).

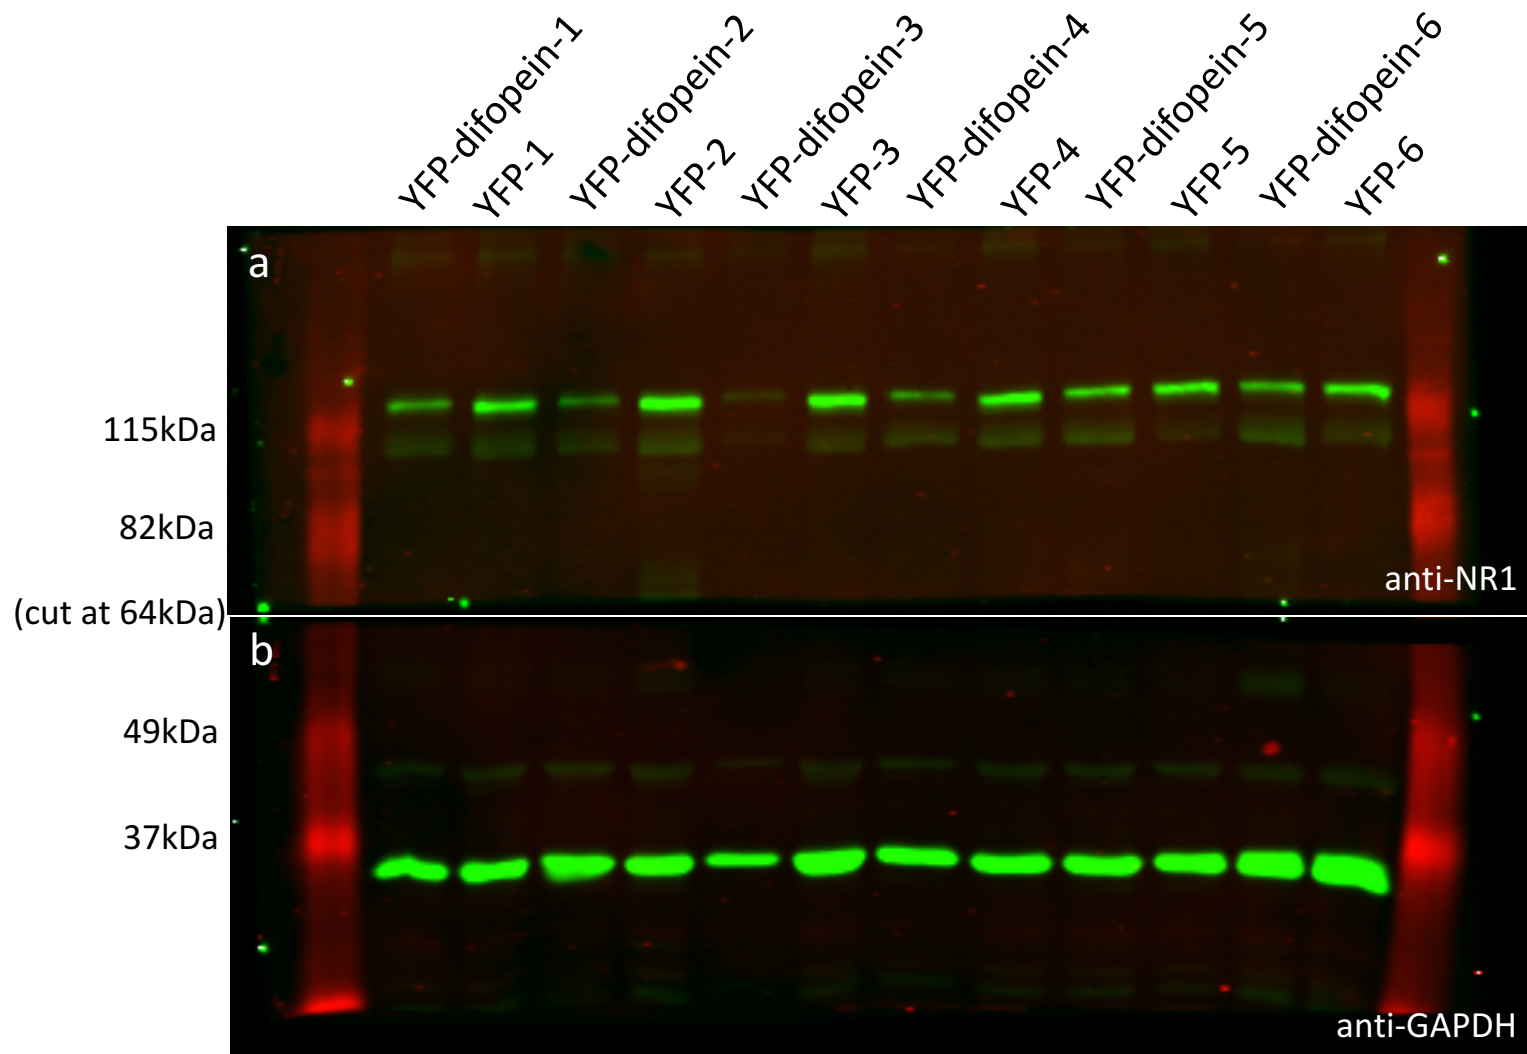

**Supplementary Figure 5.** Un-cropped blot #1 for Fig.6A. This membrane was cut in the at 64kDa after transfer. Membranes were blotted with anti-NR1(a) and anti-GAPDH(b).

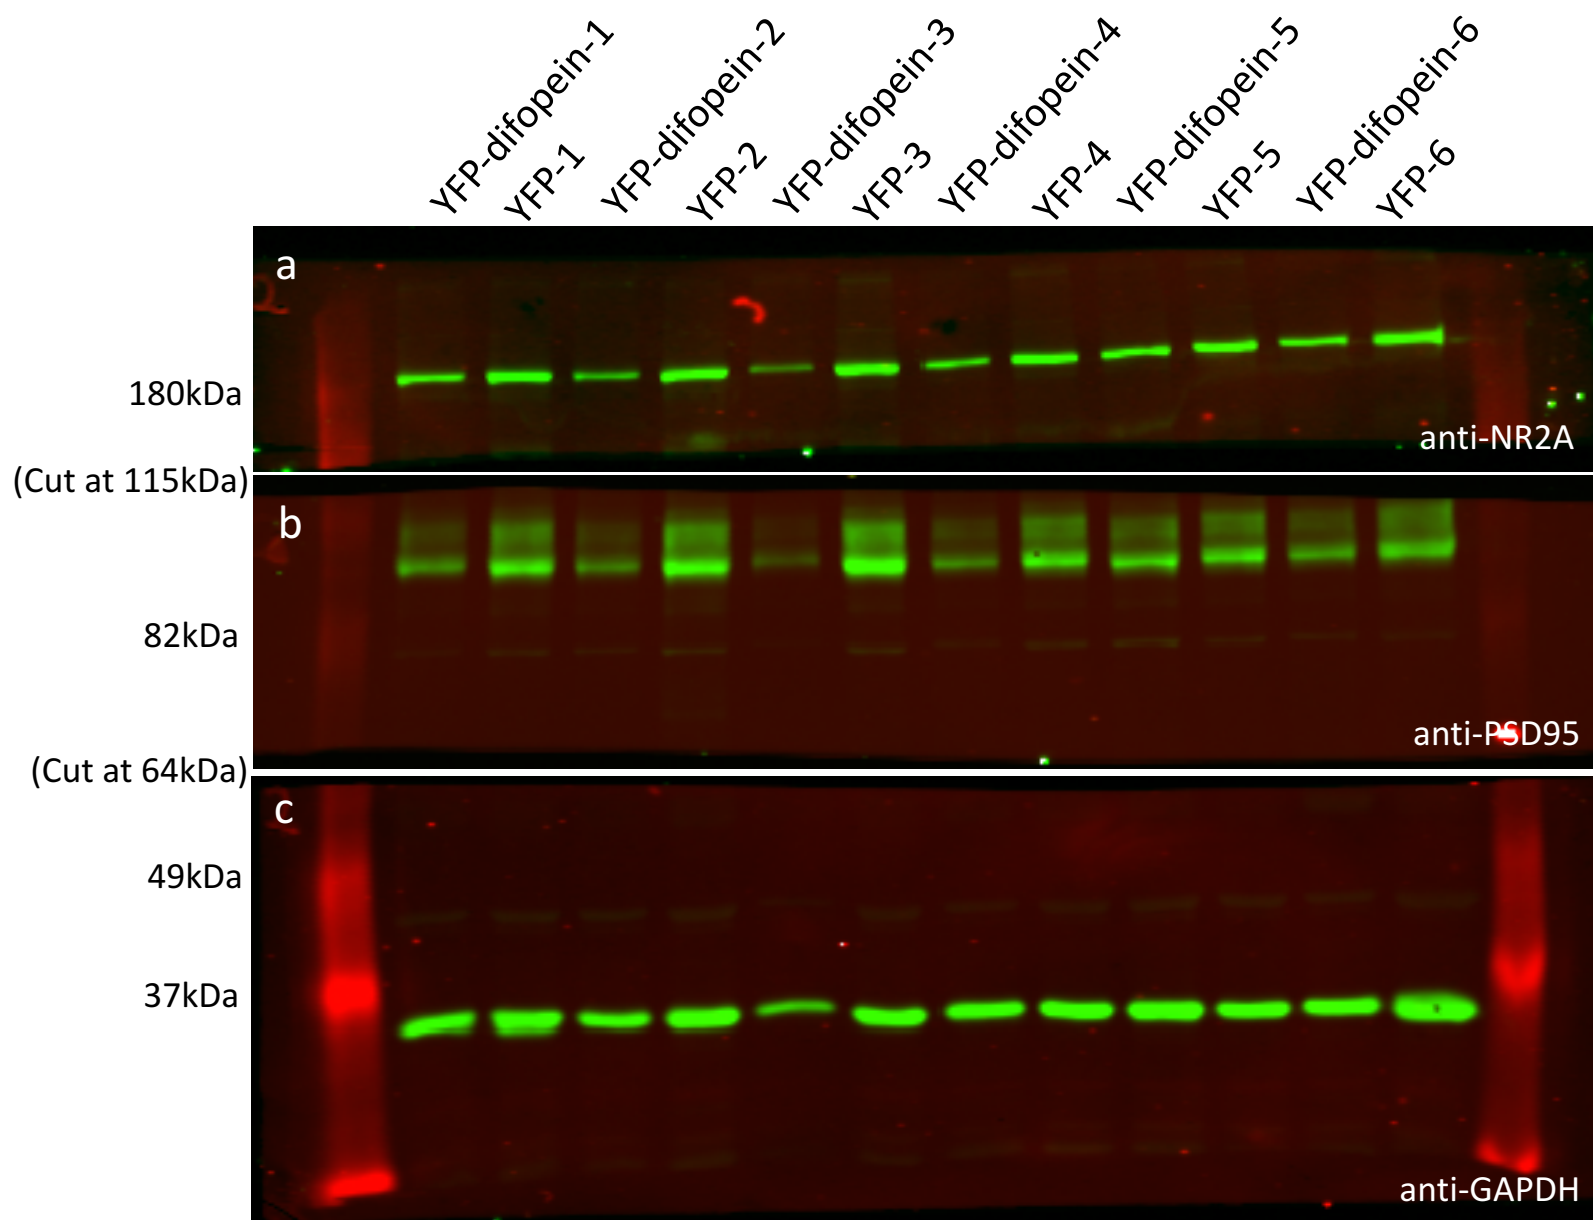

**Supplementary Figure 6.** Un-cropped blot #2 for Fig.6A. This membrane was cut in the at 115kDa and 64kDa after transfer. Membranes were blotted with anti-NR2A(a), anti-PSD95(b), and anti-GAPDH(c).
